# Supplementary material for: Tetraspanin 7 autoantibodies predict progressive decline of beta cell function in individuals with LADA
Source: Springer Nature journal article supplement (doi:10.1007/s00125-018-4799-4), 2018-12-29
Supplement: MOESM1 [file 16362624]

**Electronic supplementary material**

ESM Table 1 Baseline data of individuals with LADA

|                        | LADA without TSPAN7A (n=41) | LADA with TSPAN7A (n=12) |
|------------------------|-----------------------------|--------------------------|
| Male sex, % (n)        | 57.1 (24)                   | 50 (6)                   |
| Age, years             | 47.8±12.4                   | 46.7±10.3                |
| Duration, months       | 6 (2.5-20)                  | 8 (2-12.8)               |
| BMI, kg/m <sup>2</sup> | 24±3.6                      | 22.9±2.3                 |
| GADA titer, IU/mL      | 125.8 (52.2-689.5)          | 432.1 (34.5-822.4)       |

Data are expressed as % (n), mean±SD, and median (25th–75th percentile). LADA: latent autoimmune diabetes in adults; BMI: body mass index; GADA: glutamic acid decarboxylase antibodies. GADA, glutamic acid decarboxylase antibodies; TSPAN7A, tetraspanin 7 autoantibodies.

ESM Fig. 1

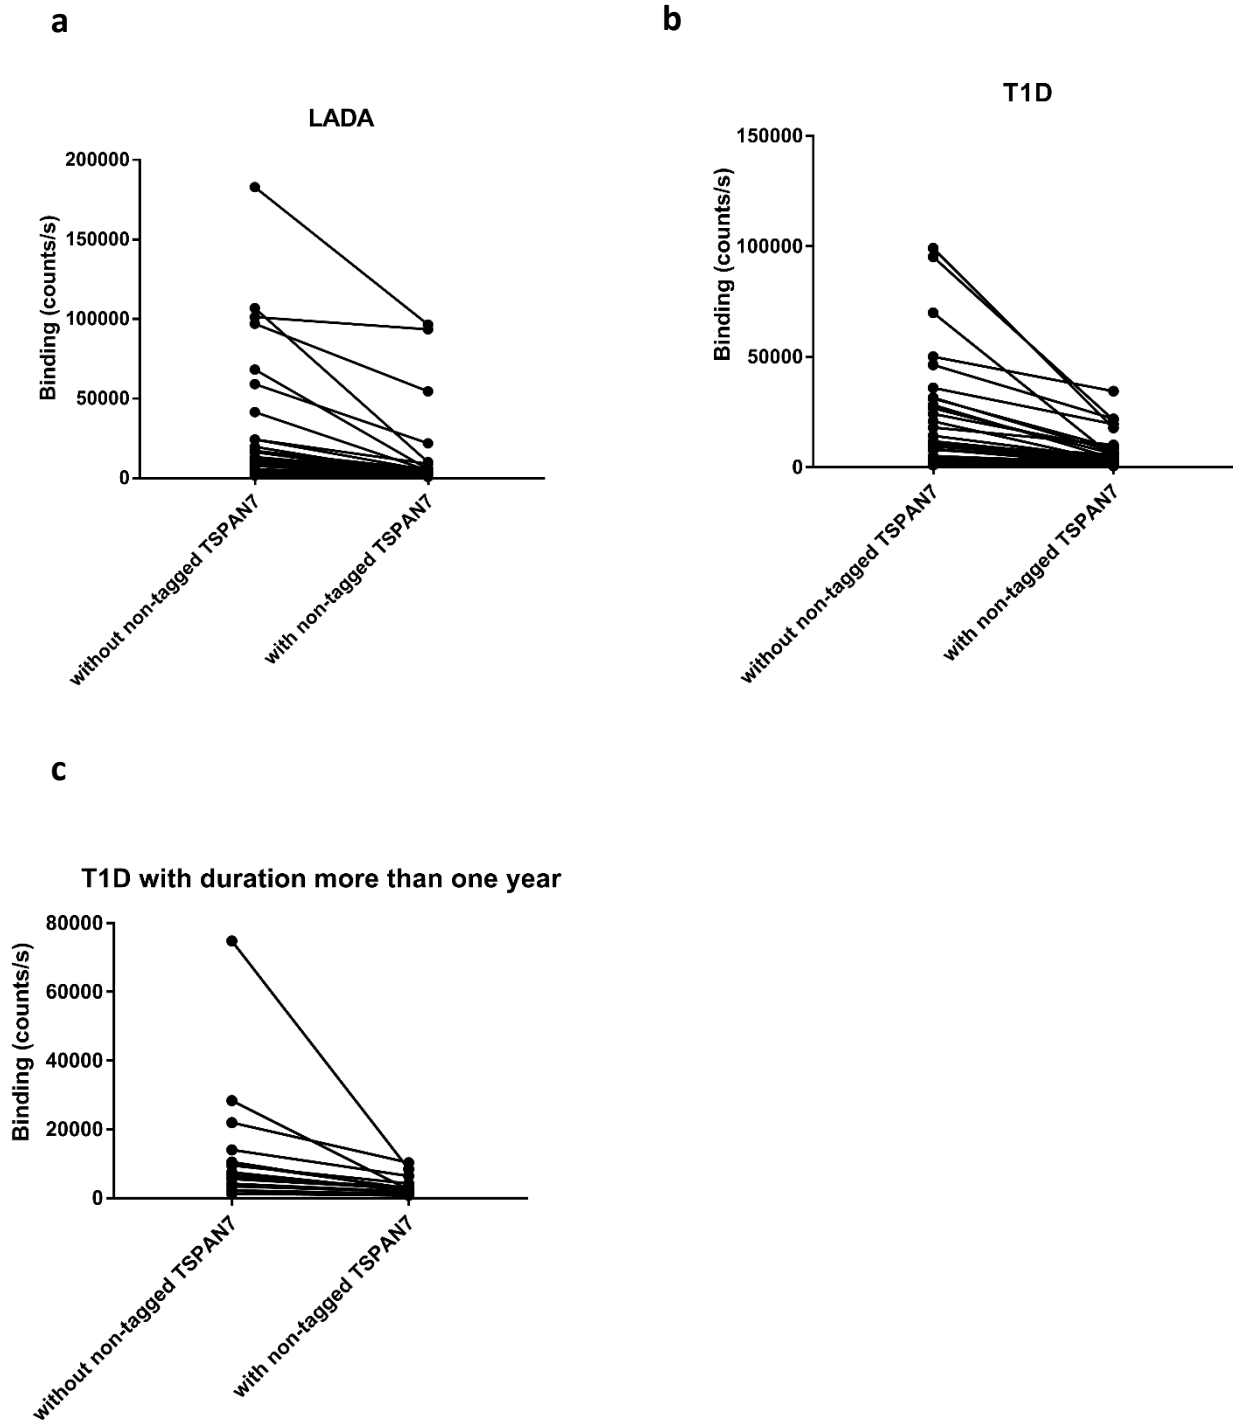

ESM Fig.1 Competition assay in the absence versus presence of non-tagged TSPAN7 in the LIPS assay. Each line represents the change in CPS caused by the addition of non-tagged TSPAN7 of each person. TSPAN7A, tetraspanin 7 antibodies; LIPS, luciferase immunoprecipitation system assay; T1D: type 1 diabetes; LADA: latent autoimmune diabetes in adults;

ESM Fig. 2

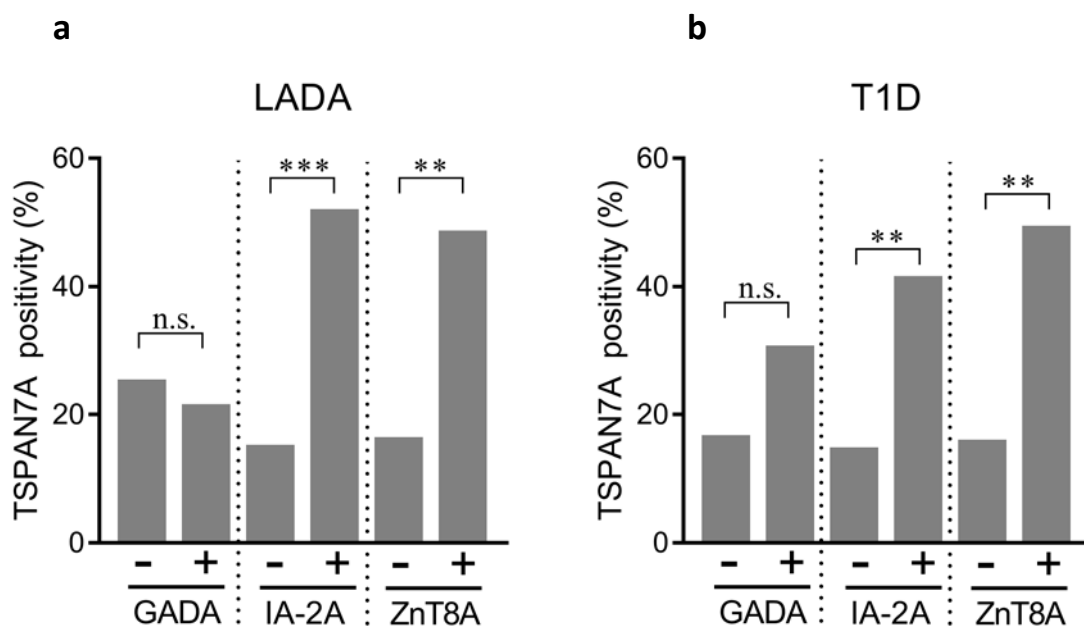

ESM Fig.2 TSPAN7A prevalence are associated with IA-2A and ZnT8A in LADA (a; n=173) and T1D (b; n=158), but not with GADA. In LADA: 21.2% vs 25% TSPAN7A positive in GADA-pos and GADA-neg individuals, respectively,  $p>0.05$ ; 51.6% vs 14.8% TSPAN7A positive in IA-2A-pos and IA-2A-neg individuals, respectively,  $p<0.001$ ; 48.3% vs 16% TSPAN7A positive in ZnT8A-pos and ZnT8A-neg patients, respectively,  $p<0.01$ ; In T1D: 30.3% vs 16.3% TSPAN7A positive in GADA-pos and GADA-neg individuals, respectively,  $p>0.05$ ; 41.2% vs 14.4% TSPAN7A positive in IA-2A-pos and IA-2A-neg individuals, respectively,  $p<0.01$ ; 49% vs 15.6% TSPAN7A positive in ZnT8A-pos and ZnT8A-neg patients, respectively,  $p<0.01$ ; LADA: Latent autoimmune diabetes in adults; T1D: type 1 diabetes; GADA: glutamic acid decarboxylase antibodies; IA-2A: protein tyrosine phosphatase autoantibodies; ZnT8A: zinc transporter 8 antibodies; TSPAN7A: tetraspanin 7 antibodies; n.s.: not significant; vs versus. \*\* $p<0.01$ , \*\*\* $p<0.001$ .
